# Supplementary material for: Effects of Acetone Vapor on the Exciton Band Photoluminescence Emission from Single- and Few-Layer WS2 on Template-Stripped Gold
Source: Sensors (Basel). 2019 Apr 23;19(8):1913. doi: 10.3390/s19081913 (PMC6514759; doi:10.3390/s19081913)
Supplement: Supplementary file 1 [file sensors-19-01913-s001.pdf]

*Supplementary Materials*

# Effects of Acetone Vapor on the Exciton Band Photoluminescence Emission from Single- and Few-Layer WS<sub>2</sub> on Template-Stripped Gold

Samantha Matthews, Chuan Zhao, Hao Zeng and Frank V. Bright

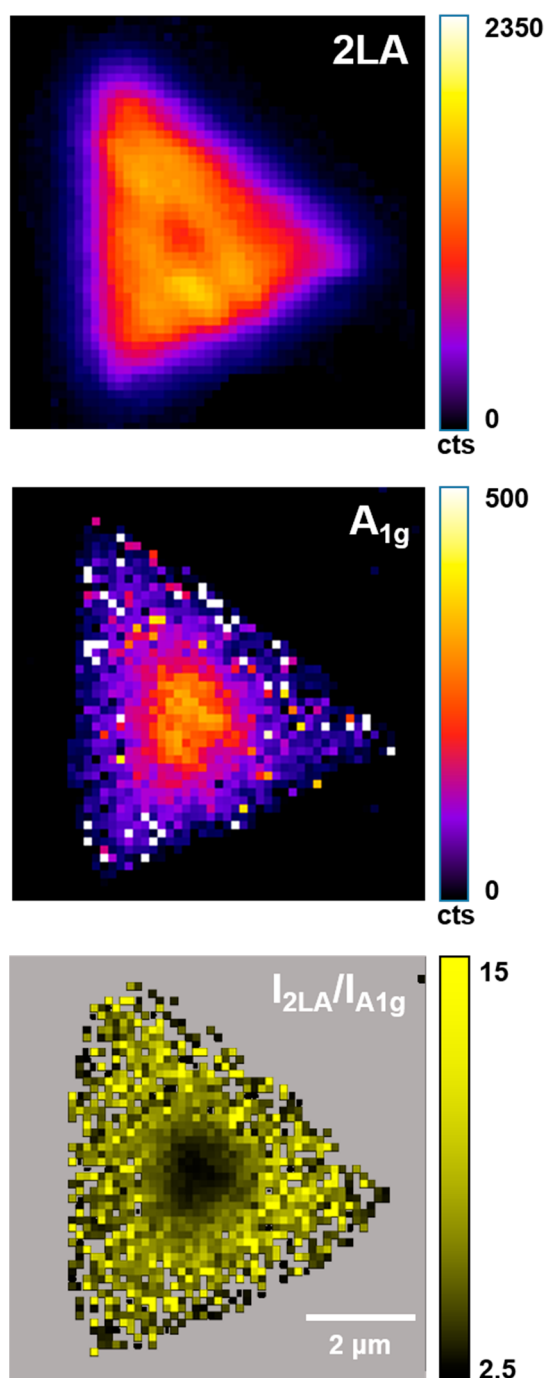

**Figure S1.** Initial Raman maps and layer count ratio.

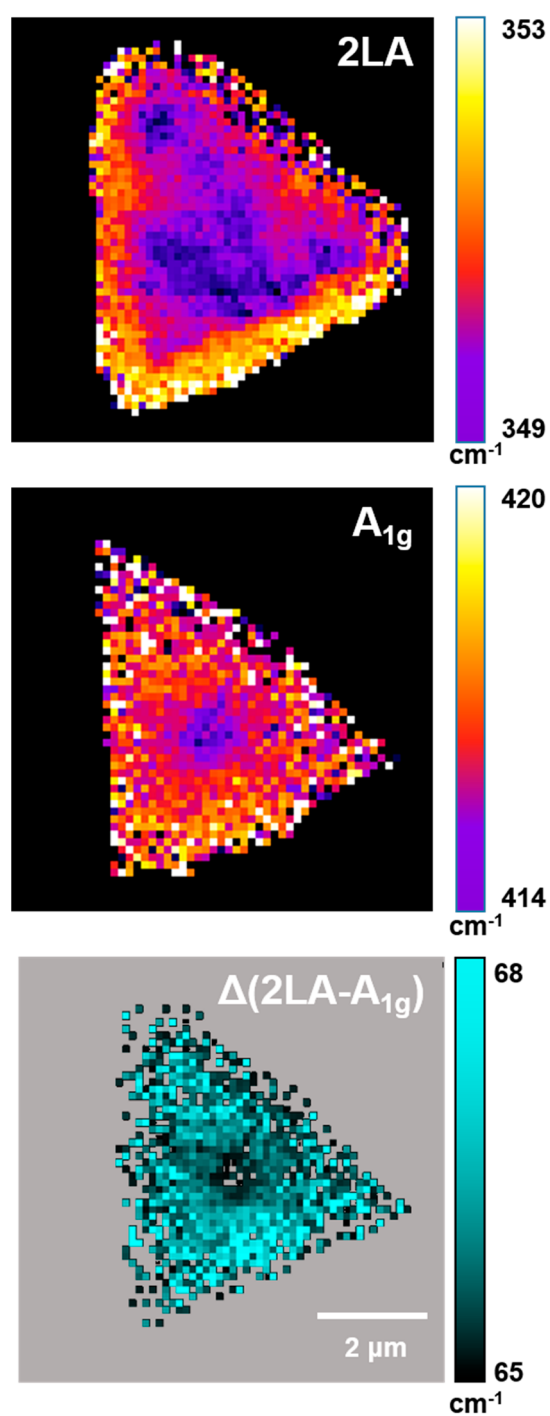

Figure S2. Initial Raman maps and layer count difference.

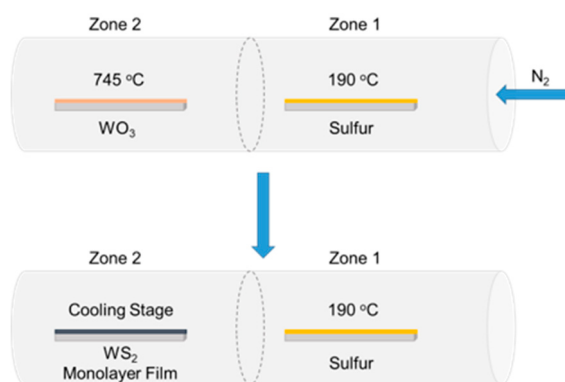

**Figure S3.** Simplified schematic depicting WS<sub>2</sub> fabrication.
